# Supplementary material for: Diabetic Retinopathy Environment-Wide Association Study (EWAS) in NHANES 2005–2008
Source: PubMed Central journal article supplement (PMC7696981; doi:10.3390/jcm9113643), 2020-11-12
Supplement: jcm-09-03643-s001.pdf [file jcm-09-03643-s001.pdf]

## SUPPLEMENTARY TABLES

**Table S1.** Examination, demographic, and laboratory variables excluded from the study due to having zero variance.

| <b>Examination</b> | <b>Demographic</b> | <b>Laboratory</b>  |
|--------------------|--------------------|--------------------|
| OPDDSNV            | FIAPROXY           | CARB E, URDMTOLC   |
| OPDSBCO            | RIDSTATR           | CARB E, URDOMOLC   |
| OPDSSNV            | SDDSRVYR           | CARB E, URXMTO     |
| OPDUSNV            |                    | CARB E, URXOMO     |
| VIQ110             |                    | FOLFMS E, LBDSFILC |
| VIQ130             |                    | HEPBD E, LBDHD     |
|                    |                    | PAH E, URDP01LC    |
|                    |                    | PAH E, URDP02LC    |
|                    |                    | PAH E, URDP04LC    |
|                    |                    | PAH E, URDP05LC    |
|                    |                    | PAH E, URDP06LC    |
|                    |                    | PAH E, URDP17LC    |
|                    |                    | PERNT E, URDUP8LC  |
|                    |                    | PHTHTE E, URDMEPLC |
|                    |                    | PSA E, KIQ282      |
|                    |                    | SSHCV E, SSAHCVI   |
|                    |                    | UAM E, URDAAZLC    |
|                    |                    | UAM E, URDATZLC    |
|                    |                    | UAM E, URDDTZLC    |
|                    |                    | UAM E, URDSIMLC    |
|                    |                    | UAM E, URDSISLC    |
|                    |                    | UAM E, URXAAZ      |
|                    |                    | UAM E, URXATZ      |
|                    |                    | UAM E, URXDTZ      |
|                    |                    | UAM E, URXSIS      |
|                    |                    | UAM E, URXSISM     |
|                    |                    | UHM E, URDUCSLC    |
|                    |                    | UPP E, URDBSMLC    |
|                    |                    | UPP E, URDCHSLC    |
|                    |                    | UPP E, URDEMMLC    |
|                    |                    | UPP E, URDFRMLC    |
|                    |                    | UPP E, URDHLSLC    |
|                    |                    | UPP E, URDMMSLC    |
|                    |                    | UPP E, URDOXSLC    |
|                    |                    | UPP E, URDPIMLC    |
|                    |                    | UPP E, URDPROLC    |
|                    |                    | UPP E, URDRIMLC    |
|                    |                    | UPP E, URDSMMLC    |
|                    |                    | UPP E, URDSSFLC    |
|                    |                    | UPP E, URDTHFLC    |
|                    |                    | UPP E, URDTRALC    |
|                    |                    | UPP E, URDTRNLC    |
|                    |                    | UPP E, URXBMS      |
|                    |                    | UPP E, URXCHS      |
|                    |                    | UPP E, URXEMM      |
|                    |                    | UPP E, URXFRM      |
|                    |                    | UPP E, URXHLS      |
|                    |                    | UPP E, URXMSM      |
|                    |                    | UPP E, URXOXS      |
|                    |                    | UPP E, URXPIM      |
|                    |                    | UPP E, URXPRO      |

|                   |
|-------------------|
| UPP E, URXRIM     |
| UPP E, URXSMM     |
| UPP E, URXSSF     |
| UPP E, URXTHF     |
| UPP E, URXTRA     |
| UPP E, URXTRN     |
| VID E, LBDVD3LC   |
| VID E, LBDVIDLC   |
| VOCWB E, LBD4CELC |
| VOCWB E, LBDV1ALC |
| VOCWB E, LBDV1ELC |
| VOCWB E, LBDV2CLC |
| VOCWB E, LBDV2ELC |
| VOCWB E, LBDV2PLC |
| VOCWB E, LBDV2TLC |
| VOCWB E, LBDV3BLC |
| VOCWB E, LBDV4ELC |
| VOCWB E, LBDVCBLC |
| VOCWB E, LBDVDEL  |
| VOCWB E, LBDVHEL  |
| VOCWB E, LBDVTPLC |
| VOCWB E, LBDVTPLC |
| VOCWB E, LBX4CE   |
| VOCWB E, LBXV1A   |
| VOCWB E, LBXV1E   |
| VOCWB E, LBXV2C   |
| VOCWB E, LBXV2E   |
| VOCWB E, LBXV2P   |
| VOCWB E, LBXV2T   |
| VOCWB E, LBXV3B   |
| VOCWB E, LBXV4E   |
| VOCWB E, LBXVCB   |
| VOCWB E, LBXVDE   |
| VOCWB E, LBXVHE   |
| VOCWB E, LBXVTP   |

**Table S2.** Statistically significant principal components (PCs) associated with diabetic retinopathy (DR).

| PC    | Beta   | Standard Error | Z     | p-Value | OR (95% CI)              |
|-------|--------|----------------|-------|---------|--------------------------|
| PC1   | -0.23  | 0.03           | -6.73 | <0.0001 | 0.79 (95% CI: 0.74–0.85) |
| PC9   | 0.19   | 0.05           | 3.92  | <0.0001 | 1.21 (95% CI: 1.1–1.33)  |
| PC211 | -16.23 | 4.53           | -3.58 | 0.0003  | 0 (95% CI: 0–0)          |
| PC3   | -0.14  | 0.04           | -3.54 | 0.0004  | 0.87 (95% CI: 0.81–0.94) |
| PC2   | -0.10  | 0.03           | -3.20 | 0.001   | 0.9 (95% CI: 0.85–0.96)  |
| PC21  | 0.20   | 0.07           | 3.02  | 0.003   | 1.22 (95% CI: 1.07–1.39) |
| PC27  | 0.21   | 0.08           | 2.80  | 0.005   | 1.24 (95% CI: 1.07–1.43) |
| PC110 | 0.48   | 0.17           | 2.76  | 0.006   | 1.62 (95% CI: 1.15–2.28) |
| PC8   | -0.13  | 0.05           | -2.66 | 0.008   | 0.88 (95% CI: 0.8–0.97)  |
| PC142 | -0.65  | 0.24           | -2.65 | 0.008   | 0.52 (95% CI: 0.32–0.84) |
| PC38  | 0.22   | 0.09           | 2.49  | 0.01    | 1.24 (95% CI: 1.05–1.47) |
| PC34  | 0.19   | 0.08           | 2.26  | 0.02    | 1.21 (95% CI: 1.03–1.43) |
| PC25  | 0.16   | 0.07           | 2.24  | 0.03    | 1.18 (95% CI: 1.02–1.36) |
| PC105 | -0.35  | 0.16           | -2.16 | 0.03    | 0.7 (95% CI: 0.51–0.97)  |
| PC117 | -0.38  | 0.18           | -2.12 | 0.03    | 0.68 (95% CI: 0.48–0.97) |
| PC30  | 0.17   | 0.08           | 2.10  | 0.04    | 1.18 (95% CI: 1.01–1.38) |
| PC152 | -0.56  | 0.27           | -2.08 | 0.04    | 0.57 (95% CI: 0.34–0.97) |
| PC37  | -0.17  | 0.09           | -2.04 | 0.04    | 0.84 (95% CI: 0.71–0.99) |
| PC13  | 0.10   | 0.05           | 1.88  | 0.06    | 1.11 (95% CI: 1–1.23)    |

|       |        |       |       |      |                                                      |
|-------|--------|-------|-------|------|------------------------------------------------------|
| PC19  | -0.12  | 0.06  | -1.88 | 0.06 | 0.89 (95% CI: 0.79–1.01)                             |
| PC10  | 0.09   | 0.05  | 1.85  | 0.06 | 1.1 (95% CI: 0.99–1.21)                              |
| PC90  | -0.26  | 0.14  | -1.82 | 0.07 | 0.77 (95% CI: 0.58–1.02)                             |
| PC148 | -0.46  | 0.25  | -1.80 | 0.07 | 0.63 (95% CI: 0.38–1.04)                             |
| PC29  | -0.14  | 0.08  | -1.80 | 0.07 | 0.87 (95% CI: 0.75–1.01)                             |
| PC185 | 0.89   | 0.50  | 1.78  | 0.07 | 2.44 (95% CI: 0.91–6.52)                             |
| PC70  | -0.21  | 0.12  | -1.76 | 0.08 | 0.81 (95% CI: 0.64–1.02)                             |
| PC17  | -0.11  | 0.06  | -1.76 | 0.08 | 0.9 (95% CI: 0.8–1.01)                               |
| PC35  | 0.15   | 0.09  | 1.72  | 0.09 | 1.16 (95% CI: 0.98–1.39)                             |
| PC208 | -4.82  | 2.84  | -1.70 | 0.09 | 0.01 (95% CI: 0–2.11)                                |
| PC205 | -2.43  | 1.45  | -1.68 | 0.09 | 0.09 (95% CI: 0.01–1.5)                              |
| PC62  | -0.18  | 0.11  | -1.66 | 0.10 | 0.83 (95% CI: 0.67–1.03)                             |
| PC114 | -0.29  | 0.18  | -1.65 | 0.10 | 0.75 (95% CI: 0.53–1.06)                             |
| PC98  | -0.25  | 0.15  | -1.64 | 0.10 | 0.78 (95% CI: 0.58–1.05)                             |
| PC46  | 0.15   | 0.09  | 1.63  | 0.10 | 1.17 (95% CI: 0.97–1.4)                              |
| PC94  | -0.23  | 0.15  | -1.55 | 0.12 | 0.8 (95% CI: 0.6–1.06)                               |
| PC18  | -0.09  | 0.06  | -1.54 | 0.12 | 0.91 (95% CI: 0.81–1.03)                             |
| PC60  | -0.17  | 0.11  | -1.52 | 0.13 | 0.85 (95% CI: 0.68–1.05)                             |
| PC45  | -0.14  | 0.09  | -1.50 | 0.13 | 0.87 (95% CI: 0.72–1.04)                             |
| PC197 | 1.00   | 0.68  | 1.47  | 0.14 | 2.72 (95% CI: 0.72–10.29)                            |
| PC118 | 0.26   | 0.18  | 1.42  | 0.15 | 1.3 (95% CI: 0.91–1.85)                              |
| PC77  | 0.18   | 0.13  | 1.41  | 0.16 | 1.2 (95% CI: 0.93–1.54)                              |
| PC150 | -0.36  | 0.26  | -1.40 | 0.16 | 0.7 (95% CI: 0.42–1.16)                              |
| PC89  | -0.19  | 0.14  | -1.36 | 0.17 | 0.83 (95% CI: 0.63–1.09)                             |
| PC184 | 0.68   | 0.52  | 1.32  | 0.19 | 1.98 (95% CI: 0.72–5.46)                             |
| PC79  | -0.17  | 0.13  | -1.32 | 0.19 | 0.84 (95% CI: 0.65–1.09)                             |
| PC20  | -0.09  | 0.07  | -1.31 | 0.19 | 0.92 (95% CI: 0.81–1.04)                             |
| PC64  | -0.15  | 0.11  | -1.31 | 0.19 | 0.86 (95% CI: 0.69–1.08)                             |
| PC74  | -0.16  | 0.12  | -1.30 | 0.19 | 0.85 (95% CI: 0.68–1.08)                             |
| PC216 | 120.42 | 92.41 | 1.30  | 0.19 | 1.98482520108455E+52 (95% CI: 0–9.137746010503E+130) |
| PC93  | 0.20   | 0.15  | 1.30  | 0.19 | 1.22 (95% CI: 0.9–1.64)                              |
| PC47  | -0.13  | 0.10  | -1.30 | 0.19 | 0.88 (95% CI: 0.72–1.07)                             |
| PC86  | -0.18  | 0.14  | -1.29 | 0.20 | 0.84 (95% CI: 0.64–1.1)                              |
| PC158 | 0.36   | 0.29  | 1.26  | 0.21 | 1.44 (95% CI: 0.82–2.52)                             |
| PC124 | -0.24  | 0.19  | -1.24 | 0.21 | 0.79 (95% CI: 0.54–1.15)                             |
| PC33  | 0.10   | 0.08  | 1.24  | 0.21 | 1.11 (95% CI: 0.94–1.3)                              |
| PC11  | 0.06   | 0.05  | 1.24  | 0.22 | 1.06 (95% CI: 0.96–1.18)                             |
| PC200 | 1.04   | 0.85  | 1.23  | 0.22 | 2.84 (95% CI: 0.54–14.98)                            |
| PC16  | -0.07  | 0.06  | -1.22 | 0.22 | 0.93 (95% CI: 0.83–1.04)                             |
| PC190 | -0.68  | 0.56  | -1.22 | 0.22 | 0.51 (95% CI: 0.17–1.52)                             |
| PC138 | -0.28  | 0.23  | -1.21 | 0.23 | 0.76 (95% CI: 0.49–1.19)                             |
| PC68  | 0.14   | 0.12  | 1.18  | 0.24 | 1.15 (95% CI: 0.91–1.44)                             |
| PC175 | 0.42   | 0.36  | 1.15  | 0.25 | 1.52 (95% CI: 0.75–3.07)                             |
| PC66  | 0.13   | 0.11  | 1.15  | 0.25 | 1.14 (95% CI: 0.91–1.43)                             |
| PC39  | -0.10  | 0.09  | -1.13 | 0.26 | 0.9 (95% CI: 0.75–1.08)                              |
| PC202 | 1.06   | 0.94  | 1.13  | 0.26 | 2.87 (95% CI: 0.46–18.04)                            |
| PC87  | -0.16  | 0.14  | -1.12 | 0.26 | 0.86 (95% CI: 0.65–1.12)                             |
| PC157 | 0.31   | 0.28  | 1.12  | 0.26 | 1.36 (95% CI: 0.79–2.36)                             |
| PC134 | 0.24   | 0.22  | 1.11  | 0.27 | 1.28 (95% CI: 0.83–1.96)                             |
| PC122 | 0.21   | 0.19  | 1.09  | 0.27 | 1.23 (95% CI: 0.85–1.78)                             |
| PC192 | -0.63  | 0.57  | -1.09 | 0.27 | 0.53 (95% CI: 0.17–1.65)                             |
| PC176 | 0.39   | 0.37  | 1.06  | 0.29 | 1.48 (95% CI: 0.72–3.04)                             |
| PC144 | -0.25  | 0.24  | -1.05 | 0.29 | 0.78 (95% CI: 0.48–1.25)                             |
| PC104 | -0.17  | 0.16  | -1.04 | 0.30 | 0.84 (95% CI: 0.61–1.16)                             |
| PC214 | -17.04 | 16.48 | -1.03 | 0.30 | 0 (95% CI: 0–4213127.42)                             |
| PC57  | 0.11   | 0.11  | 1.03  | 0.30 | 1.11 (95% CI: 0.91–1.37)                             |
| PC149 | -0.27  | 0.26  | -1.02 | 0.31 | 0.77 (95% CI: 0.46–1.28)                             |
| PC102 | 0.15   | 0.15  | 1.00  | 0.32 | 1.16 (95% CI: 0.87–1.57)                             |

|       |       |       |       |      |                                      |
|-------|-------|-------|-------|------|--------------------------------------|
| PC153 | -0.26 | 0.26  | -0.99 | 0.32 | 0.77 (95% CI: 0.46–1.29)             |
| PC12  | 0.05  | 0.05  | 0.98  | 0.33 | 1.05 (95% CI: 0.95–1.17)             |
| PC212 | 5.01  | 5.28  | 0.95  | 0.34 | 149.65 (95% CI: 0–4697021.47)        |
| PC28  | -0.07 | 0.08  | -0.95 | 0.34 | 0.93 (95% CI: 0.8–1.08)              |
| PC26  | -0.07 | 0.07  | -0.93 | 0.35 | 0.93 (95% CI: 0.81–1.08)             |
| PC130 | -0.19 | 0.21  | -0.93 | 0.35 | 0.83 (95% CI: 0.55–1.24)             |
| PC54  | -0.09 | 0.10  | -0.91 | 0.36 | 0.91 (95% CI: 0.74–1.11)             |
| PC42  | -0.08 | 0.09  | -0.90 | 0.37 | 0.92 (95% CI: 0.77–1.1)              |
| PC187 | -0.47 | 0.53  | -0.88 | 0.38 | 0.63 (95% CI: 0.22–1.77)             |
| PC126 | -0.17 | 0.19  | -0.88 | 0.38 | 0.84 (95% CI: 0.58–1.23)             |
| PC168 | -0.28 | 0.32  | -0.88 | 0.38 | 0.76 (95% CI: 0.41–1.41)             |
| PC188 | 0.48  | 0.55  | 0.87  | 0.38 | 1.61 (95% CI: 0.55–4.71)             |
| PC145 | 0.21  | 0.24  | 0.87  | 0.38 | 1.23 (95% CI: 0.77–1.98)             |
| PC215 | 10.14 | 11.66 | 0.87  | 0.38 | 25387.49 (95% CI: 0–212202584172954) |
| PC196 | 0.57  | 0.66  | 0.86  | 0.39 | 1.76 (95% CI: 0.49–6.37)             |
| PC113 | -0.15 | 0.18  | -0.86 | 0.39 | 0.86 (95% CI: 0.61–1.21)             |
| PC95  | 0.13  | 0.15  | 0.86  | 0.39 | 1.14 (95% CI: 0.85–1.52)             |
| PC217 | ##### | ##### | 0.85  | 0.39 | NA                                   |
| PC108 | 0.14  | 0.17  | 0.85  | 0.40 | 1.15 (95% CI: 0.83–1.59)             |
| PC112 | -0.14 | 0.17  | -0.83 | 0.41 | 0.87 (95% CI: 0.62–1.21)             |
| PC65  | -0.09 | 0.11  | -0.83 | 0.41 | 0.91 (95% CI: 0.73–1.14)             |
| PC195 | 0.53  | 0.64  | 0.83  | 0.41 | 1.71 (95% CI: 0.48–6.03)             |
| PC167 | -0.26 | 0.32  | -0.83 | 0.41 | 0.77 (95% CI: 0.41–1.43)             |
| PC88  | 0.12  | 0.14  | 0.83  | 0.41 | 1.12 (95% CI: 0.85–1.48)             |
| PC67  | 0.10  | 0.12  | 0.82  | 0.41 | 1.1 (95% CI: 0.88–1.38)              |
| PC171 | -0.27 | 0.34  | -0.79 | 0.43 | 0.76 (95% CI: 0.39–1.49)             |
| PC136 | -0.18 | 0.22  | -0.79 | 0.43 | 0.84 (95% CI: 0.54–1.3)              |
| PC15  | -0.04 | 0.06  | -0.77 | 0.44 | 0.96 (95% CI: 0.85–1.07)             |
| PC191 | 0.43  | 0.57  | 0.76  | 0.45 | 1.54 (95% CI: 0.5–4.73)              |
| PC166 | 0.24  | 0.31  | 0.75  | 0.45 | 1.27 (95% CI: 0.68–2.34)             |
| PC209 | 2.14  | 2.84  | 0.75  | 0.45 | 8.48 (95% CI: 0.03–2222.54)          |
| PC225 | ##### | ##### | -0.72 | 0.47 | NA                                   |
| PC99  | -0.11 | 0.15  | -0.72 | 0.47 | 0.9 (95% CI: 0.66–1.21)              |
| PC23  | -0.05 | 0.07  | -0.71 | 0.47 | 0.95 (95% CI: 0.83–1.09)             |
| PC143 | 0.17  | 0.24  | 0.71  | 0.48 | 1.19 (95% CI: 0.74–1.89)             |
| PC40  | -0.06 | 0.09  | -0.70 | 0.48 | 0.94 (95% CI: 0.79–1.12)             |
| PC170 | -0.23 | 0.33  | -0.70 | 0.48 | 0.79 (95% CI: 0.42–1.51)             |
| PC181 | 0.29  | 0.42  | 0.68  | 0.50 | 1.33 (95% CI: 0.59–3.02)             |
| PC219 | ##### | ##### | -0.68 | 0.50 | NA                                   |
| PC44  | -0.06 | 0.09  | -0.66 | 0.51 | 0.94 (95% CI: 0.78–1.13)             |
| PC120 | 0.12  | 0.19  | 0.66  | 0.51 | 1.13 (95% CI: 0.78–1.63)             |
| PC75  | -0.08 | 0.12  | -0.65 | 0.51 | 0.92 (95% CI: 0.72–1.18)             |
| PC147 | -0.16 | 0.25  | -0.64 | 0.52 | 0.85 (95% CI: 0.52–1.39)             |
| PC220 | ##### | ##### | 0.63  | 0.53 | NA                                   |
| PC51  | 0.06  | 0.10  | 0.63  | 0.53 | 1.06 (95% CI: 0.88–1.29)             |
| PC84  | 0.08  | 0.14  | 0.63  | 0.53 | 1.09 (95% CI: 0.83–1.42)             |
| PC164 | -0.18 | 0.30  | -0.60 | 0.55 | 0.83 (95% CI: 0.46–1.51)             |
| PC137 | 0.14  | 0.22  | 0.60  | 0.55 | 1.14 (95% CI: 0.74–1.77)             |
| PC32  | -0.05 | 0.08  | -0.60 | 0.55 | 0.95 (95% CI: 0.81–1.12)             |
| PC180 | 0.24  | 0.40  | 0.59  | 0.55 | 1.27 (95% CI: 0.58–2.8)              |
| PC125 | 0.11  | 0.19  | 0.57  | 0.57 | 1.12 (95% CI: 0.76–1.63)             |
| PC146 | -0.14 | 0.25  | -0.57 | 0.57 | 0.87 (95% CI: 0.53–1.41)             |
| PC154 | 0.15  | 0.27  | 0.56  | 0.58 | 1.16 (95% CI: 0.69–1.97)             |
| PC119 | -0.10 | 0.19  | -0.54 | 0.59 | 0.9 (95% CI: 0.63–1.3)               |
| PC73  | 0.07  | 0.12  | 0.54  | 0.59 | 1.07 (95% CI: 0.84–1.35)             |
| PC201 | -0.46 | 0.87  | -0.53 | 0.59 | 0.63 (95% CI: 0.11–3.47)             |
| PC36  | 0.04  | 0.08  | 0.53  | 0.60 | 1.05 (95% CI: 0.89–1.23)             |
| PC123 | 0.10  | 0.19  | 0.53  | 0.60 | 1.11 (95% CI: 0.76–1.61)             |
| PC100 | -0.08 | 0.15  | -0.52 | 0.60 | 0.92 (95% CI: 0.68–1.25)             |

|       |       |       |       |      |                           |
|-------|-------|-------|-------|------|---------------------------|
| PC174 | -0.18 | 0.35  | -0.51 | 0.61 | 0.84 (95% CI: 0.42–1.67)  |
| PC50  | -0.05 | 0.10  | -0.50 | 0.62 | 0.95 (95% CI: 0.78–1.16)  |
| PC151 | 0.13  | 0.26  | 0.49  | 0.62 | 1.14 (95% CI: 0.68–1.9)   |
| PC226 | ##### | ##### | 0.49  | 0.63 | NA                        |
| PC199 | 0.36  | 0.77  | 0.47  | 0.64 | 1.44 (95% CI: 0.32–6.51)  |
| PC182 | -0.20 | 0.43  | -0.46 | 0.64 | 0.82 (95% CI: 0.36–1.89)  |
| PC69  | 0.05  | 0.12  | 0.46  | 0.65 | 1.06 (95% CI: 0.84–1.33)  |
| PC169 | -0.15 | 0.32  | -0.45 | 0.65 | 0.86 (95% CI: 0.46–1.63)  |
| PC179 | 0.18  | 0.40  | 0.45  | 0.65 | 1.2 (95% CI: 0.55–2.6)    |
| PC97  | -0.07 | 0.15  | -0.44 | 0.66 | 0.94 (95% CI: 0.7–1.26)   |
| PC173 | -0.15 | 0.35  | -0.43 | 0.67 | 0.86 (95% CI: 0.44–1.7)   |
| PC189 | 0.23  | 0.55  | 0.42  | 0.67 | 1.26 (95% CI: 0.43–3.73)  |
| PC133 | -0.09 | 0.21  | -0.42 | 0.68 | 0.92 (95% CI: 0.61–1.39)  |
| PC71  | 0.05  | 0.12  | 0.41  | 0.68 | 1.05 (95% CI: 0.83–1.33)  |
| PC224 | ##### | ##### | 0.41  | 0.68 | NA                        |
| PC160 | 0.12  | 0.29  | 0.41  | 0.68 | 1.13 (95% CI: 0.63–2.01)  |
| PC78  | -0.05 | 0.13  | -0.40 | 0.69 | 0.95 (95% CI: 0.74–1.22)  |
| PC76  | 0.05  | 0.13  | 0.40  | 0.69 | 1.05 (95% CI: 0.82–1.34)  |
| PC156 | -0.11 | 0.28  | -0.40 | 0.69 | 0.9 (95% CI: 0.52–1.54)   |
| PC163 | -0.12 | 0.30  | -0.39 | 0.69 | 0.89 (95% CI: 0.49–1.61)  |
| PC109 | 0.07  | 0.17  | 0.39  | 0.69 | 1.07 (95% CI: 0.77–1.49)  |
| PC162 | 0.12  | 0.30  | 0.39  | 0.70 | 1.12 (95% CI: 0.63–2.01)  |
| PC59  | 0.04  | 0.11  | 0.39  | 0.70 | 1.04 (95% CI: 0.84–1.29)  |
| PC58  | -0.04 | 0.10  | -0.38 | 0.70 | 0.96 (95% CI: 0.78–1.18)  |
| PC193 | 0.24  | 0.63  | 0.38  | 0.70 | 1.27 (95% CI: 0.37–4.4)   |
| PC115 | -0.07 | 0.18  | -0.37 | 0.71 | 0.94 (95% CI: 0.66–1.32)  |
| PC198 | -0.26 | 0.71  | -0.37 | 0.71 | 0.77 (95% CI: 0.19–3.09)  |
| PC177 | -0.14 | 0.38  | -0.36 | 0.72 | 0.87 (95% CI: 0.42–1.82)  |
| PC72  | -0.04 | 0.12  | -0.36 | 0.72 | 0.96 (95% CI: 0.75–1.21)  |
| PC91  | -0.05 | 0.14  | -0.36 | 0.72 | 0.95 (95% CI: 0.72–1.26)  |
| PC22  | 0.02  | 0.07  | 0.35  | 0.73 | 1.02 (95% CI: 0.9–1.17)   |
| PC41  | 0.03  | 0.09  | 0.35  | 0.73 | 1.03 (95% CI: 0.86–1.23)  |
| PC101 | 0.05  | 0.16  | 0.35  | 0.73 | 1.06 (95% CI: 0.78–1.43)  |
| PC165 | -0.11 | 0.31  | -0.34 | 0.73 | 0.9 (95% CI: 0.49–1.65)   |
| PC139 | -0.08 | 0.23  | -0.33 | 0.74 | 0.93 (95% CI: 0.59–1.45)  |
| PC210 | -1.07 | 3.21  | -0.33 | 0.74 | 0.34 (95% CI: 0–187.7)    |
| PC128 | -0.07 | 0.20  | -0.33 | 0.74 | 0.94 (95% CI: 0.63–1.38)  |
| PC129 | 0.07  | 0.20  | 0.32  | 0.75 | 1.07 (95% CI: 0.72–1.59)  |
| PC83  | -0.04 | 0.13  | -0.31 | 0.76 | 0.96 (95% CI: 0.74–1.25)  |
| PC132 | -0.06 | 0.21  | -0.30 | 0.76 | 0.94 (95% CI: 0.62–1.42)  |
| PC5   | -0.01 | 0.04  | -0.29 | 0.77 | 0.99 (95% CI: 0.92–1.07)  |
| PC4   | -0.01 | 0.04  | -0.28 | 0.78 | 0.99 (95% CI: 0.92–1.06)  |
| PC43  | -0.03 | 0.09  | -0.28 | 0.78 | 0.97 (95% CI: 0.81–1.17)  |
| PC159 | 0.08  | 0.29  | 0.27  | 0.79 | 1.08 (95% CI: 0.61–1.9)   |
| PC82  | -0.03 | 0.13  | -0.27 | 0.79 | 0.97 (95% CI: 0.75–1.25)  |
| PC6   | -0.01 | 0.04  | -0.26 | 0.79 | 0.99 (95% CI: 0.91–1.08)  |
| PC31  | -0.02 | 0.08  | -0.26 | 0.80 | 0.98 (95% CI: 0.84–1.14)  |
| PC49  | -0.03 | 0.10  | -0.26 | 0.80 | 0.98 (95% CI: 0.81–1.18)  |
| PC127 | 0.05  | 0.20  | 0.26  | 0.80 | 1.05 (95% CI: 0.71–1.55)  |
| PC161 | 0.07  | 0.29  | 0.25  | 0.80 | 1.08 (95% CI: 0.61–1.91)  |
| PC85  | -0.03 | 0.14  | -0.24 | 0.81 | 0.97 (95% CI: 0.74–1.26)  |
| PC111 | 0.04  | 0.17  | 0.23  | 0.82 | 1.04 (95% CI: 0.74–1.45)  |
| PC203 | 0.22  | 1.02  | 0.22  | 0.83 | 1.25 (95% CI: 0.17–9.23)  |
| PC55  | 0.02  | 0.10  | 0.21  | 0.83 | 1.02 (95% CI: 0.83–1.26)  |
| PC207 | 0.30  | 1.45  | 0.20  | 0.84 | 1.34 (95% CI: 0.08–23.25) |
| PC141 | -0.05 | 0.23  | -0.20 | 0.84 | 0.95 (95% CI: 0.6–1.51)   |
| PC223 | ##### | ##### | -0.18 | 0.85 | NA                        |
| PC14  | -0.01 | 0.06  | -0.18 | 0.86 | 0.99 (95% CI: 0.89–1.1)   |
| PC7   | -0.01 | 0.04  | -0.18 | 0.86 | 0.99 (95% CI: 0.91–1.08)  |

|       |       |       |       |      |                            |
|-------|-------|-------|-------|------|----------------------------|
| PC56  | 0.02  | 0.10  | 0.17  | 0.86 | 1.02 (95% CI: 0.83–1.25)   |
| PC121 | -0.03 | 0.19  | -0.17 | 0.86 | 0.97 (95% CI: 0.67–1.4)    |
| PC221 | ##### | ##### | -0.17 | 0.87 | NA                         |
| PC186 | 0.08  | 0.51  | 0.17  | 0.87 | 1.09 (95% CI: 0.4–2.93)    |
| PC80  | 0.02  | 0.13  | 0.15  | 0.88 | 1.02 (95% CI: 0.79–1.32)   |
| PC131 | -0.03 | 0.21  | -0.15 | 0.88 | 0.97 (95% CI: 0.64–1.46)   |
| PC222 | ##### | ##### | -0.15 | 0.88 | NA                         |
| PC52  | -0.01 | 0.10  | -0.13 | 0.89 | 0.99 (95% CI: 0.81–1.2)    |
| PC140 | 0.03  | 0.23  | 0.13  | 0.90 | 1.03 (95% CI: 0.65–1.63)   |
| PC48  | 0.01  | 0.10  | 0.13  | 0.90 | 1.01 (95% CI: 0.84–1.22)   |
| PC155 | -0.03 | 0.27  | -0.12 | 0.90 | 0.97 (95% CI: 0.56–1.65)   |
| PC172 | -0.04 | 0.34  | -0.12 | 0.90 | 0.96 (95% CI: 0.49–1.88)   |
| PC106 | 0.02  | 0.16  | 0.12  | 0.91 | 1.02 (95% CI: 0.74–1.4)    |
| PC116 | -0.02 | 0.18  | -0.11 | 0.91 | 0.98 (95% CI: 0.69–1.39)   |
| PC63  | -0.01 | 0.11  | -0.10 | 0.92 | 0.99 (95% CI: 0.79–1.23)   |
| PC81  | -0.01 | 0.13  | -0.09 | 0.93 | 0.99 (95% CI: 0.76–1.28)   |
| PC194 | 0.05  | 0.61  | 0.08  | 0.94 | 1.05 (95% CI: 0.32–3.48)   |
| PC135 | -0.01 | 0.22  | -0.07 | 0.95 | 0.99 (95% CI: 0.64–1.52)   |
| PC92  | -0.01 | 0.15  | -0.06 | 0.95 | 0.99 (95% CI: 0.75–1.32)   |
| PC183 | -0.02 | 0.44  | -0.05 | 0.96 | 0.98 (95% CI: 0.41–2.31)   |
| PC107 | 0.01  | 0.17  | 0.05  | 0.96 | 1.01 (95% CI: 0.73–1.39)   |
| PC61  | 0.00  | 0.11  | 0.04  | 0.97 | 1 (95% CI: 0.81–1.24)      |
| PC53  | 0.00  | 0.10  | -0.03 | 0.98 | 1 (95% CI: 0.82–1.21)      |
| PC213 | 0.19  | 6.20  | 0.03  | 0.98 | 1.21 (95% CI: 0–228449.56) |
| PC178 | -0.01 | 0.38  | -0.03 | 0.98 | 0.99 (95% CI: 0.47–2.1)    |
| PC96  | 0.00  | 0.15  | 0.03  | 0.98 | 1 (95% CI: 0.75–1.35)      |
| PC206 | -0.03 | 1.31  | -0.02 | 0.98 | 0.97 (95% CI: 0.07–12.6)   |
| PC103 | 0.00  | 0.16  | 0.02  | 0.99 | 1 (95% CI: 0.74–1.37)      |
| PC218 | ##### | ##### | -0.01 | 0.99 | NA                         |
| PC24  | 0.00  | 0.07  | 0.00  | 1.00 | 1 (95% CI: 0.87–1.14)      |
| PC204 | 0.00  | 1.23  | 0.00  | 1.00 | 1 (95% CI: 0.09–11.13)     |

Notes: Principal component analysis was performed on laboratory variables in an unsupervised fashion, with resulting PCs regressed against DR outcome.

**Table S3.** RandomForest™-selected features for replication cohort NHANES 2005-2006.

| Marker                                   | Mean decrease accuracy | Mean decrease gini |
|------------------------------------------|------------------------|--------------------|
| Glycohemoglobin (%)                      | 16.96                  | 18.06              |
| Pyridoxal 5'-phosphate (nmol/L)          | 8.15                   | 5.24               |
| Total Cholesterol (mmol/L)               | 8.14                   | 6.33               |
| Cholesterol (mmol/L)                     | 7.53                   | 6.10               |
| Blood urea nitrogen (mmol/L)             | 5.62                   | 5.14               |
| Diastolic blood pressure                 | 4.76                   | 5.94               |
| Albumin, urine (mg/L)                    | 4.25                   | 6.00               |
| Hematocrit (%)                           | 4.18                   | 3.35               |
| Lactate dehydrogenase LDH (U/L)          | 3.97                   | 4.44               |
| Mono-(2-ethyl-5-hydroxyhexyl) phthalate  | 3.72                   | 1.75               |
| Uranium, urinary (µg/L)                  | 3.57                   | 2.55               |
| 2-amnothiazolne-4-carboxylic acid(ng/mL) | 3.51                   | 3.25               |
| Mono-n-methyl phthalate                  | 3.22                   | 1.85               |
| Urinary nitrate (ng/mL)                  | 3.20                   | 7.25               |
| Blood Carbon Tetrachloride (ng/mL)       | 3.06                   | 0.70               |
| Perchlorate, water (ng/mL)               | 2.61                   | 3.50               |
| Iron, refrigerated (µmol/L)              | 2.59                   | 4.87               |
| Potassium (mmol/L)                       | 2.47                   | 4.06               |
| Nitrate, water (ng/mL)                   | 2.35                   | 2.61               |
| Red blood cell count (million cells/µL)  | 1.89                   | 4.61               |
| Mono-2-ethyl-5-carboxypentyl phthalate   | 1.67                   | 2.02               |
| Hemoglobin (g/dL)                        | 1.47                   | 2.47               |

|                                             |      |      |
|---------------------------------------------|------|------|
| 2-hydroxyphenanthrene (ng/L)                | 1.24 | 2.50 |
| Dimethyldithiophosphate ( $\mu\text{g/L}$ ) | 1.05 | 1.24 |
| Alkaline phosphatase (U/L)                  | 0.80 | 4.56 |
| Propyl paraben (ng/ml)                      | 0.80 | 3.02 |

Notes: The model was initially trained on all laboratory variables in an unsupervised fashion, with Kappa-based model tuning to select the optimum values for "mtry" (the ideal number of variables to randomly sample) and "ntrees" (the ideal number of trees). Only features contributing >1% mean decrease in accuracy from initial model were retained.

### Supplementary figures

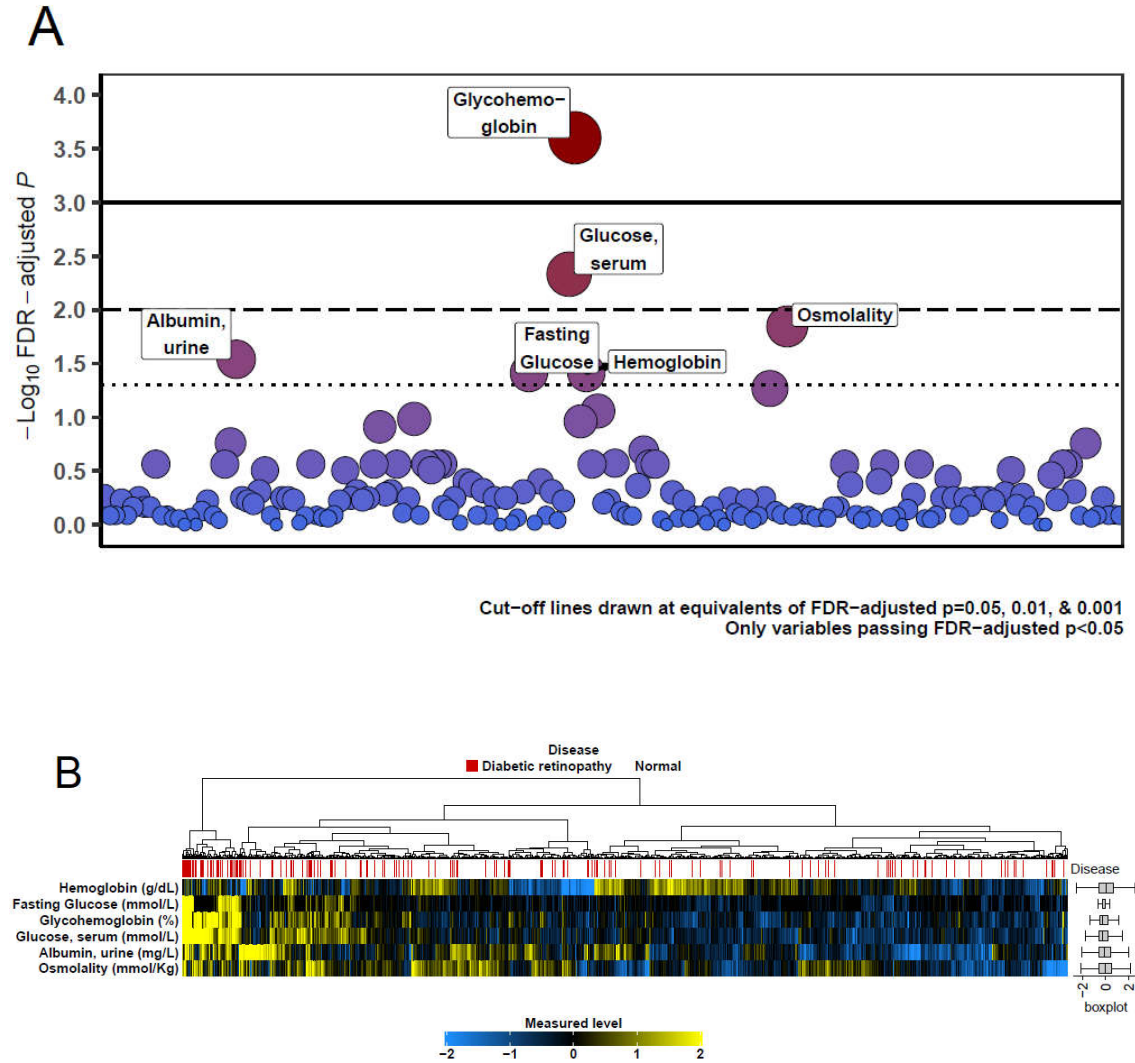

**Figure S1.** Laboratory variables statistically significantly associated with diabetic retinopathy.

Variables were tested in a univariate fashion, with all  $p$ -values then adjusted for false discovery rate (FDR). Six variables reached statistical significance at FDR-adjusted  $p \leq 0.05$ . **A)** Manhattan plot of laboratory variables associated with diabetic retinopathy from univariate testing. Variables were tested via a compute-parallelized procedure, with  $p$ -values then adjusted for false discovery rate (FDR). Six variables reached statistical significance at FDR-adjusted  $p \leq 0.05$ . Y-axis is plotting  $-\log_{10}$  (FDR-adjusted  $p$ -value). **B)** clustering and heatmap.

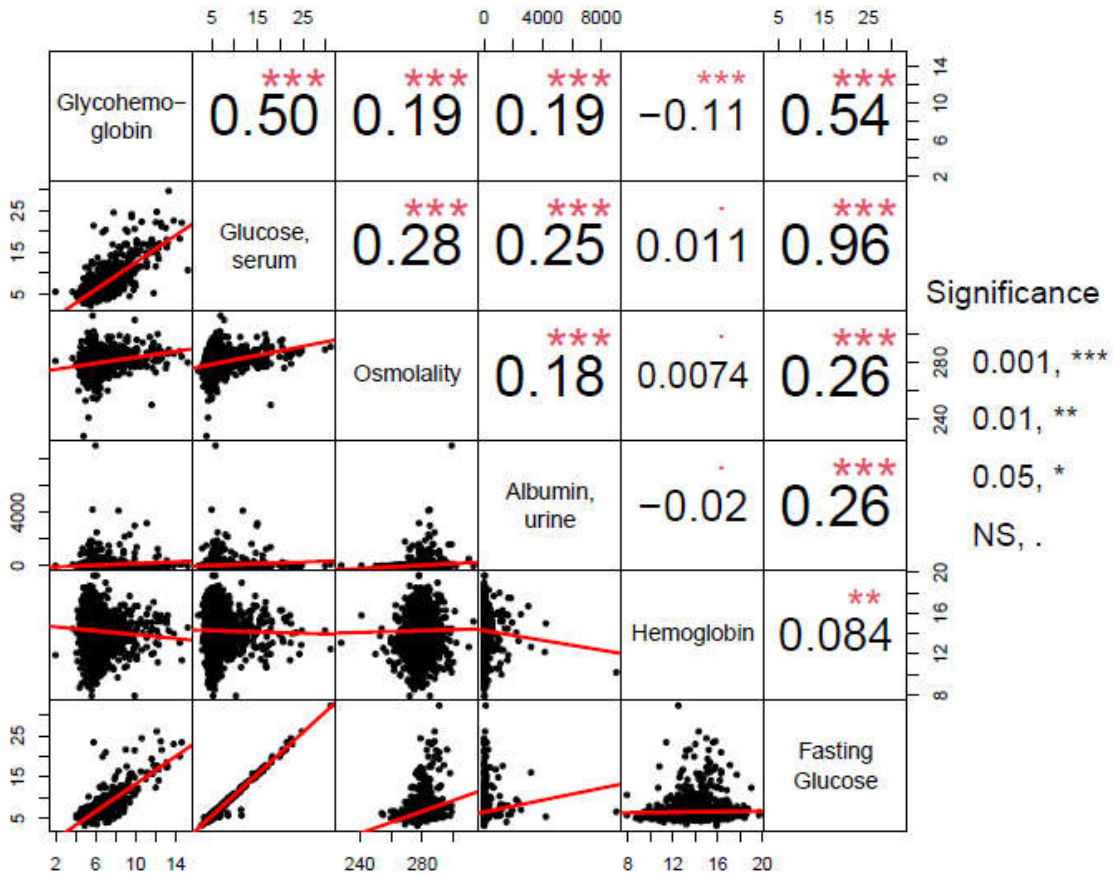

**Figure S2.** Inter-correlation among laboratory variables statistically significantly associated with diabetic retinopathy.

Bottom triangle, scatter plots with linear regression fit line. Top triangle, Spearman  $\rho$  coefficients, with  $p$ -value from correlation test indicated by asterisks.



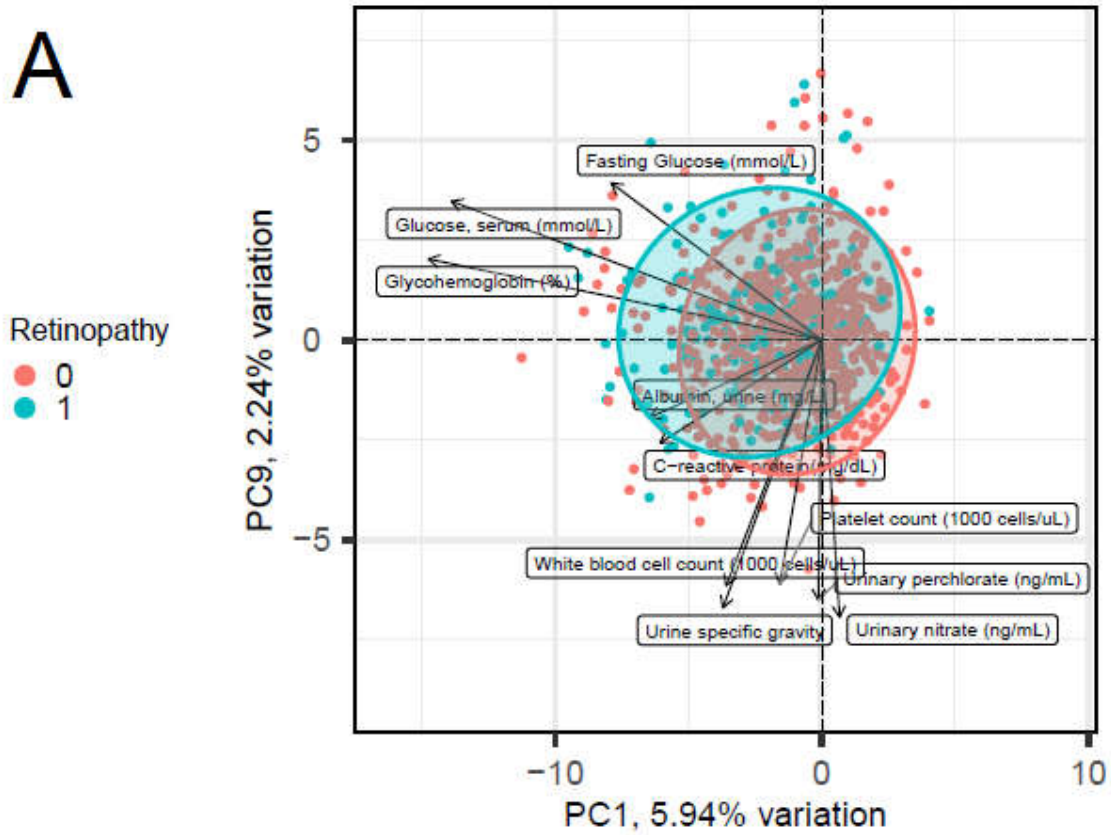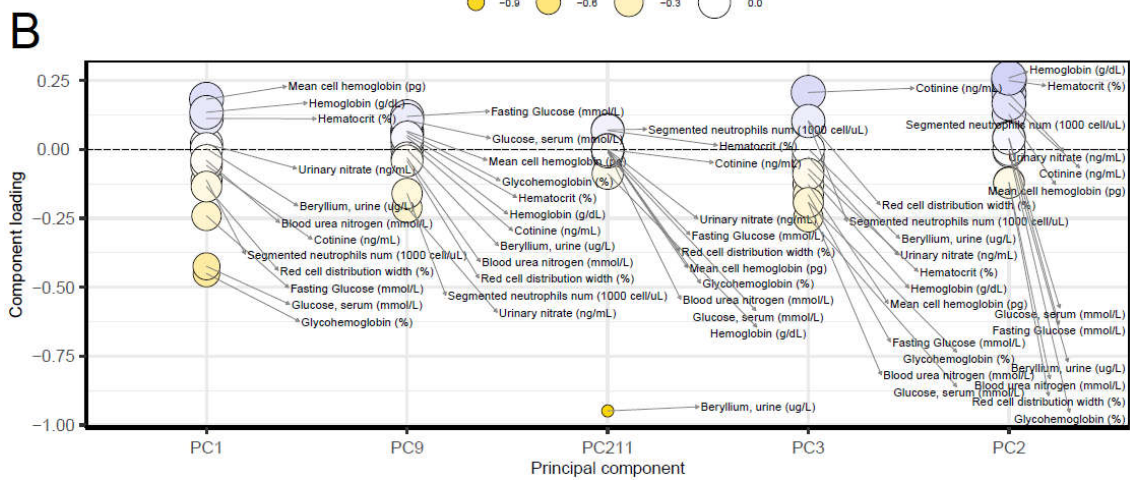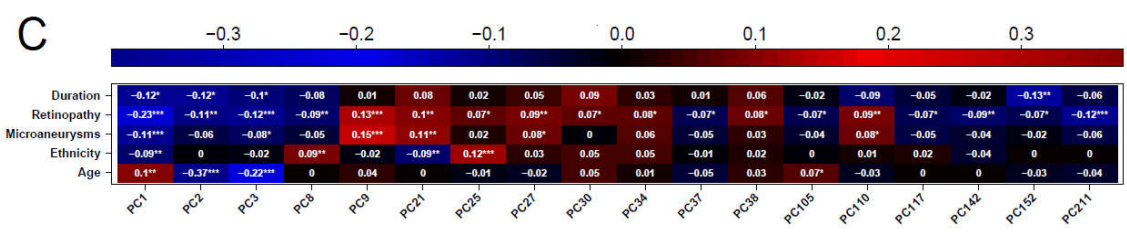

Figure S3. Principal component analysis (PCA) highlights key sources of variation in the cohort.

PCA was performed in an unsupervised fashion on laboratory variables. A, bi-plot of PC1 versus PC9, the top two PCs statistically significantly associated with diabetic retinopathy (DR) (see **Supplementary Table 2**), reveals HbA1c, CRP, and others as key drivers of variation along these PCs. 0, no retinopathy; 1, retinopathy. B, top variables contributing to variation along top five PCs statistically significantly associated with DR. C, "eigenplot" comparing covariates (age, ethnicity, and diabetes duration), retinopathy (as DR), and the top retinal lesion (microaneurysms) against all PCs statistically significantly associated with DR. The statistically significant correlations highlight relevant usage of these covariates during univariate testing. Pearson correlation values shown, with significancies: \*\*\*,  $p \leq 0.001$ ; \*\*,  $p \leq 0.01$ ; \*,  $p \leq 0.05$ .
